# Supplementary material for: Knockout of LASP1 in CXCR4 expressing CML cells promotes cell persistence, proliferation and TKI resistance
Source: PubMed Central journal article supplement (PMC7077607; doi:10.1111/jcmm.14910), 2020-01-19
Supplement: JCMM-24-2942-s003.pdf [file JCMM-24-2942-s003.pdf]

Supplemental Table 1: Primer Sequences for qRT-PCR

| Gene           | Primer sequences (5' - 3')        |                             | annealing temperature [°C] |
|----------------|-----------------------------------|-----------------------------|----------------------------|
|                | Forward                           | Reverse                     |                            |
| CXCR4          | AGG GGA TCA GTA TAT ACA CTT CAG A | GAG GAT CTT GAG GCT GGA CC  | 62                         |
| IL-6           | ATT CCA AAG ATG TAG CCG CC        | AGT GCC TCT TTG CTG CTT TC  | 59                         |
| IL-8           | AGC CTT CCT GAT TTC TGC AG        | TGT TGG CGC AGT GTG GTC     | 59                         |
| LASP1          | GAA GAA GCC CTA CTG CA            | TGA TCT GGT CCT GGG TCT TC  | 62                         |
| LASP1-NIC-h2-1 | CAC TGA AGT CCT CCT GTG GG        | CTT GAG GCG AAG GTT TTC CG  | 61                         |
| LASP1-NIC-h2-2 | ACA GAG TGA GCT CCA GAG TC        | ATT TCA GCA CCT TGG CCT TG  | 61                         |
| LASP2          | GCG GAA AAG TCG TGT ATC CC        | CGT GGT GAA GGA CTG CTT C   | 60                         |
| MCP-1          | AAA GTC TCT GCC GCC CTT C         | ACT TGC TGC TGG TGA TTC TTC | 60                         |

Supplemental Table 2: GSEA: Top 50 results from GSEA for LASP1 co- and antiregulated gene sets in imatinib nonresponders and responders

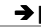

| Nonresponders                                                                         |        |           |           |            | LASP1-antiregulated                                                                                                      |         |           |           |            |
|---------------------------------------------------------------------------------------|--------|-----------|-----------|------------|--------------------------------------------------------------------------------------------------------------------------|---------|-----------|-----------|------------|
| LASP1-coregulated NAME                                                                | NES    | NOM p-val | FDR q-val | FWER p-val | NAME                                                                                                                     | NES     | NOM p-val | FDR q-val | FWER p-val |
| KEGG OLFACTORY TRANSDUCTION                                                           |        |           |           |            | REACTOME RESPIRATORY ELECTRON TRANSPORT                                                                                  | -2.5147 | 0.0000    | 0.0000    | 0.0000     |
| REACTOME OLFACTORY SIGNALING PATHWAY                                                  | 2.4198 | 0.0000    | 0.0011    | 0.0010     | REACTOME RESPIRATORY ELECTRON TRANSPORT ATP SYNTHESIS BY CHEMOSMOTIC COUPLING AND HEAT PRODUCTION BY UNCOUPLING PROTEINS | -2.4482 | 0.0000    | 0.0000    | 0.0000     |
| BIOCARTA IL2 PATHWAY                                                                  | 2.4164 | 0.0000    | 0.0006    | 0.0010     | ROSS AML OF FAB M7 TYPE                                                                                                  | -2.4475 | 0.0000    | 0.0000    | 0.0000     |
| PID REELIN PATHWAY                                                                    | 2.1150 | 0.0000    | 0.0298    | 0.0730     | MOOTHA VOXPHOS                                                                                                           | -2.3493 | 0.0000    | 0.0000    | 0.0000     |
| DUNNE TARGETS OF AML1 MTG8 FUSION UP                                                  | 2.0991 | 0.0000    | 0.0297    | 0.0970     | KEGG PARKINSONS DISEASE                                                                                                  | -2.2926 | 0.0000    | 0.0003    | 0.0020     |
| REACTOME INCRETIN SYNTHESIS SECRETION AND INACTIVATION                                | 2.0786 | 0.0000    | 0.0318    | 0.1270     | BILANGES SERUM AND RAPAMYCIN SENSITIVE GENES                                                                             | -2.2893 | 0.0000    | 0.0003    | 0.0020     |
| PID EPHA FWDPATHWAY                                                                   | 2.0478 | 0.0000    | 0.0416    | 0.1930     | WELCH GATA1 TARGETS                                                                                                      | -2.2701 | 0.0000    | 0.0006    | 0.0050     |
| BIOCARTA IL2RB PATHWAY                                                                | 2.0339 | 0.0000    | 0.0434    | 0.2330     | REACTOME PEPTIDE CHAIN ELONGATION                                                                                        | -2.2679 | 0.0000    | 0.0006    | 0.0060     |
| HAHTOLA CTCL PATHOGENESIS                                                             | 2.0125 | 0.0000    | 0.0496    | 0.2910     | CHNG MULTIPLE MYELOMA HYPERPLOID UP                                                                                      | -2.2503 | 0.0000    | 0.0011    | 0.0110     |
| RICKMAN HEAD AND NECK CANCER                                                          | 1.9883 | 0.0000    | 0.0616    | 0.3860     | REACTOME RNA POL I TRANSCRIPTION                                                                                         | -2.2364 | 0.0000    | 0.0014    | 0.0160     |
| BIOCARTA BCR PATHWAY                                                                  | 1.9776 | 0.0000    | 0.0630    | 0.4200     | PECE MAMMARY STEM CELL UP                                                                                                | -2.2150 | 0.0000    | 0.0017    | 0.0210     |
| OUYANG PROSTATE CANCER PROGRESSION UP                                                 | 1.9740 | 0.0000    | 0.0595    | 0.4340     | REACTOME INFLUENZA VIRAL RNA TRANSCRIPTION AND REPLICATION                                                               | -2.2114 | 0.0000    | 0.0016    | 0.0220     |
| PLASARI NFIC TARGETS BASAL UP                                                         | 1.9693 | 0.0000    | 0.0576    | 0.4510     | LI DCP2 BOUND MRNA                                                                                                       | -2.1969 | 0.0000    | 0.0022    | 0.0320     |
| REACTOME HEDGEHOG GLI PATHWAY                                                         | 1.9666 | 0.0019    | 0.0547    | 0.4610     | REACTOME TRANSCRIPTION                                                                                                   | -2.1895 | 0.0000    | 0.0023    | 0.0370     |
| PID TXA2PATHWAY                                                                       | 1.9639 | 0.0020    | 0.0529    | 0.4740     | REACTOME RNA POL I RNA POL III AND MITOCHONDRIAL TRANSCRIPTION                                                           | -2.1813 | 0.0000    | 0.0023    | 0.0400     |
| REACTOME SYNTHESIS SECRETION AND INACTIVATION OF GLP1                                 | 1.9595 | 0.0000    | 0.0516    | 0.4890     | REACTOME FORMATION OF TRANSCRIPTION COUPLED NER TC NER REPAIR COMPLEX                                                    | -2.1798 | 0.0000    | 0.0023    | 0.0430     |
| PID AR PATHWAY                                                                        | 1.9528 | 0.0020    | 0.0517    | 0.5170     | CHEN HOXA5 TARGETS 9HR UP                                                                                                | -2.1770 | 0.0000    | 0.0023    | 0.0450     |
| MCCLUNG DELTA FOSB TARGETS 8WK                                                        | 1.9354 | 0.0019    | 0.0598    | 0.5930     | REACTOME FORMATION OF THE HIV1 EARLY ELONGATION COMPLEX                                                                  | -2.1702 | 0.0000    | 0.0024    | 0.0500     |
| MCBRYAN PUBERTAL BREAST 6 7WK UP                                                      | 1.9340 | 0.0000    | 0.0572    | 0.5980     | KEGG RIBOSOME                                                                                                            | -2.1619 | 0.0000    | 0.0025    | 0.0540     |
| BIOCARTA PDGF PATHWAY                                                                 | 1.9297 | 0.0000    | 0.0575    | 0.6190     | WONG MITOCHONDRIA GENE MODULE                                                                                            | -2.1577 | 0.0000    | 0.0027    | 0.0590     |
| BIOCARTA CDC42RAC PATHWAY                                                             | 1.9266 | 0.0000    | 0.0565    | 0.6320     | MANN RESPONSE TO AMIFOSTINE UP                                                                                           | -2.1573 | 0.0000    | 0.0025    | 0.0590     |
| TAKEDA TARGETS OF NUP98 HOXA9 FUSION 80 DN                                            | 1.9228 | 0.0000    | 0.0564    | 0.6480     | REACTOME RNA POL I PROMOTER OPENING                                                                                      | -2.1573 | 0.0000    | 0.0035    | 0.0850     |
| BIOCARTA IL6 PATHWAY                                                                  | 1.9098 | 0.0000    | 0.0637    | 0.7090     | REACTOME 3 UTR MEDIATED TRANSLATIONAL REGULATION                                                                         | -2.1322 | 0.0000    | 0.0034    | 0.0860     |
| SCHAEFFER SOX9 TARGETS IN PROSTATE DEVELOPMENT DN                                     | 1.9090 | 0.0018    | 0.0615    | 0.7150     | REACTOME RNA POL III CHAIN ELONGATION                                                                                    | -2.1151 | 0.0000    | 0.0039    | 0.1010     |
| LEE DIFFERENTIATING T LYMPHOCYTE                                                      | 1.9088 | 0.0000    | 0.0591    | 0.7150     | STARK PREFRONTAL CORTEX 22O11 DELETION DN                                                                                | -2.1004 | 0.0000    | 0.0048    | 0.1290     |
| WANG IMMORTALIZED BY HOXA9 AND MEIS1 UP                                               | 1.9081 | 0.0000    | 0.0571    | 0.7150     | GRAHAM CML QUIESCENT VS NORMAL QUIESCENT UP                                                                              | -2.0907 | 0.0000    | 0.0052    | 0.1450     |
| REACTOME REGULATION OF SIGNALING BY CSL                                               | 1.8994 | 0.0000    | 0.0603    | 0.7590     | KEGG HUNTINGTONS DISEASE                                                                                                 | -2.0851 | 0.0000    | 0.0053    | 0.1540     |
| MCBRYAN PUBERTAL BREAST 5 6WK DN                                                      | 1.8906 | 0.0020    | 0.0642    | 0.7930     | REACTOME FORMATION OF RNA POL II ELONGATION COMPLEX                                                                      | -2.0793 | 0.0000    | 0.0054    | 0.1600     |
| KAMIKUBO MYELOID CEBPA NETWORK                                                        | 1.8831 | 0.0000    | 0.0669    | 0.8160     | REACTOME ABORTIVE ELONGATION OF HIV1 TRANSCRIPT IN THE ABSENCE OF TAT                                                    | -2.0743 | 0.0022    | 0.0056    | 0.1740     |
| BIOCARTA EGF PATHWAY                                                                  | 1.8815 | 0.0000    | 0.0661    | 0.8270     | REACTOME RNA POL II TRANSCRIPTION PRE INITIATION AND PROMOTER OPENING                                                    | -2.0701 | 0.0000    | 0.0057    | 0.1800     |
| KEGG VIBRIO CHOLERAEE INFECTION                                                       | 1.8802 | 0.0019    | 0.0647    | 0.8320     | REACTOME PACKAGING OF TELOMERE ENDS                                                                                      | -2.0659 | 0.0000    | 0.0057    | 0.1900     |
| LIU NASOPHARYNGEAL CARCINOMA                                                          | 1.8779 | 0.0019    | 0.0639    | 0.8410     | KEGG OXIDATIVE PHOSPHORYLATION                                                                                           | -2.0652 | 0.0000    | 0.0056    | 0.1920     |
| PID IL2 STATS PATHWAY                                                                 | 1.8745 | 0.0000    | 0.0641    | 0.8480     | REACTOME RNA POL II PRE TRANSCRIPTION EVENTS                                                                             | -2.0590 | 0.0000    | 0.0061    | 0.2110     |
| PID MAPK TRK PATHWAY                                                                  | 1.8737 | 0.0019    | 0.0626    | 0.8500     | TAKAO RESPONSE TO UVB RADIATION UP                                                                                       | -2.0416 | 0.0000    | 0.0071    | 0.2530     |
| BIOCARTA PYK2 PATHWAY                                                                 | 1.8666 | 0.0019    | 0.0656    | 0.8720     | KEGG RNA POLYMERASE                                                                                                      | -2.0145 | 0.0000    | 0.0094    | 0.3270     |
| BILBAN B CLL LPL UP                                                                   | 1.8653 | 0.0020    | 0.0648    | 0.8750     | REACTOME TCA CYCLE AND RESPIRATORY ELECTRON TRANSPORT                                                                    | -2.0138 | 0.0000    | 0.0093    | 0.3290     |
| BIOCARTA BIOPEPTIDES PATHWAY                                                          | 1.8650 | 0.0000    | 0.0632    | 0.8750     | MOREAUX MULTIPLE MYELOMA BY TACI DN                                                                                      | -1.9942 | 0.0000    | 0.0111    | 0.3900     |
| REACTOME AMINO ACID AND OLIGOPEPTIDE SLC TRANSPORTERS                                 | 1.8578 | 0.0000    | 0.0665    | 0.8920     | REACTOME ACTIVATION OF THE MRNA UPON BINDING OF THE CAP BINDING COMPLEX AND EIFS AND SUBSEQUENT BINDING TO 43S           | -1.9889 | 0.0000    | 0.0115    | 0.4130     |
| VERNOCHET ADIPOGENESIS                                                                | 1.8532 | 0.0036    | 0.0683    | 0.9060     | REACTOME RNA POL III TRANSCRIPTION TERMINATION                                                                           | -1.9794 | 0.0000    | 0.0127    | 0.4500     |
| BIOCARTA MET PATHWAY                                                                  | 1.8517 | 0.0020    | 0.0677    | 0.9120     | DAZARD UV RESPONSE CLUSTER G2                                                                                            | -1.9705 | 0.0042    | 0.0138    | 0.4790     |
| HINATA NFKB TARGETS                                                                   | 1.8482 | 0.0000    | 0.0687    | 0.9180     | SARTIPY BLUNTED BY INSULIN RESISTANCE DN                                                                                 | -1.9501 | 0.0021    | 0.0169    | 0.5580     |
| REACTOME ANTIGEN ACTIVATES B CELL RECEPTOR LEADING TO GENERATION OF SECOND MESSENGERS | 1.8459 | 0.0000    | 0.0688    | 0.9230     | GAZDA DIAMOND BLACKFAN ANEMIA MYELOID DN                                                                                 | -1.9304 | 0.0020    | 0.0203    | 0.6440     |
| PID A6B1 A6B4 INTEGRIN PATHWAY                                                        | 1.8346 | 0.0000    | 0.0758    | 0.9420     | REACTOME ELONGATION ARREST AND RECOVERY                                                                                  | -1.9268 | 0.0000    | 0.0204    | 0.6550     |
| KEGG STARCH AND SUCROSE METABOLISM                                                    | 1.8331 | 0.0000    | 0.0750    | 0.9440     | REACTOME MRNA CAPPING                                                                                                    | -1.9135 | 0.0000    | 0.0230    | 0.7010     |
| FINAK BREAST CANCER SDPP SIGNATURE                                                    | 1.8316 | 0.0000    | 0.0746    | 0.9460     | REACTOME RNA POL III TRANSCRIPTION INITIATION FROM TYPE 2 PROMOTER                                                       | -1.9114 | 0.0020    | 0.0229    | 0.7060     |
| PID MET PATHWAY                                                                       | 1.8316 | 0.0000    | 0.0729    | 0.9460     | YAO TEMPORAL RESPONSE TO PROGESTERONE CLUSTER 13                                                                         | -1.9084 | 0.0000    | 0.0229    | 0.7140     |
| GENTLES LEUKEMIC STEM CELL DN                                                         | 1.8249 | 0.0000    | 0.0761    | 0.9560     | DACOSTA UV RESPONSE VIA ERCC3 COMMON UP                                                                                  | -1.9081 | 0.0000    | 0.0225    | 0.7140     |
| KEGG FC GAMMA R MEDIATED PHAGOCYTOSIS                                                 | 1.8177 | 0.0019    | 0.0802    | 0.9660     | REACTOME INFLUENZA LIFE CYCLE                                                                                            | -1.9024 | 0.0000    | 0.0235    | 0.7430     |
| PID P38 MK2 PATHWAY                                                                   | 1.8174 | 0.0000    | 0.0788    | 0.9660     | NIKOLSKY BREAST CANCER 16P13 AMPLICON                                                                                    | -1.8984 | 0.0000    | 0.0241    | 0.7590     |
| REACTOME RAS ACTIVATION UOPN CA2 INFUX THROUGH NMDA RECEPTOR                          | 1.8172 | 0.0037    | 0.0774    | 0.9660     | KIM WT1 TARGETS DN                                                                                                       | -1.8941 | 0.0000    | 0.0246    | 0.7670     |

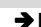

Supplemental Table 2: GSEA: Top 50 results from GSEA for LASP1 co- and antiregulated gene sets in imatinib nonresponders and responders

| Responders                                               |      |        |           |           | LASP1-antiregulated |                                                                                                                           |         |           |           |            |
|----------------------------------------------------------|------|--------|-----------|-----------|---------------------|---------------------------------------------------------------------------------------------------------------------------|---------|-----------|-----------|------------|
| LASP1-coregulated                                        | NAME | NES    | NOM p-val | FDR q-val | FWER p-val          | NAME                                                                                                                      | NES     | NOM p-val | FDR q-val | FWER p-val |
| KAMIKUBO MYELOID CEBPA NETWORK                           |      | 2.5782 | 0.0000    | 0.0000    | 0.0000              | GRAHAM CML DIVIDING VS NORMAL QUIESCENT UP                                                                                | -3.1167 | 0.0000    | 0.0000    | 0.0000     |
| TAKEDA TARGETS OF NUP98 HOXA9 FUSION 16D DN              |      |        |           |           |                     | MOREAUX MULTIPLE MYELOMA BY TACI DN                                                                                       |         |           |           |            |
|                                                          |      | 2.5665 | 0.0000    | 0.0000    | 0.0000              |                                                                                                                           | -3.0600 | 0.0000    | 0.0000    | 0.0000     |
| TAKEDA TARGETS OF NUP98 HOXA9 FUSION 8D DN               |      | 2.5657 | 0.0000    | 0.0000    | 0.0000              | GARY CD5 TARGETS DN                                                                                                       | -3.0426 | 0.0000    | 0.0000    | 0.0000     |
| GRAHAM CML QUIESCENT VS NORMAL QUIESCENT DN              |      | 2.5532 | 0.0000    | 0.0000    | 0.0000              | MANALO HYPOXIA DN                                                                                                         | -3.0398 | 0.0000    | 0.0000    | 0.0000     |
| PID IL8 CXCR1 PATHWAY                                    |      | 2.5319 | 0.0000    | 0.0000    | 0.0000              | EPPERT PROGENITOR                                                                                                         | -2.9954 | 0.0000    | 0.0000    | 0.0000     |
| PARK TRETINOLIN RESPONSE AND PML RARA FUSION             |      | 2.4329 | 0.0000    | 0.0000    | 0.0000              | CHIANG LIVER CANCER SUBCLASS UNANNOTATED DN                                                                               | -2.9542 | 0.0000    | 0.0000    | 0.0000     |
| PID IL8 CXCR2 PATHWAY                                    |      | 2.4311 | 0.0000    | 0.0000    | 0.0000              | ROSTY CERVICAL CANCER PROLIFERATION CLUSTER                                                                               | -2.9324 | 0.0000    | 0.0000    | 0.0000     |
| JAATINEN HEMATOPOIETIC STEM CELL DN                      |      | 2.4234 | 0.0000    | 0.0000    | 0.0000              | GRAHAM CML QUIESCENT VS NORMAL QUIESCENT UP                                                                               | -2.9223 | 0.0000    | 0.0000    | 0.0000     |
| BROWN MYELOID CELL DEVELOPMENT UP                        |      | 2.3451 | 0.0000    | 0.0004    | 0.0030              | WONG EMBRYONIC STEM CELL CORE                                                                                             | -2.9113 | 0.0000    | 0.0000    | 0.0000     |
| LEE DIFFERENTIATING T LYMPHOCYTE                         |      | 2.3345 | 0.0000    | 0.0003    | 0.0030              | BENPORATH PROLIFERATION                                                                                                   | -2.9110 | 0.0000    | 0.0000    | 0.0000     |
| WINPENNINGKX MELANOMA METASTASIS DN                      |      | 2.3009 | 0.0000    | 0.0004    | 0.0040              | WONG MITOCHONDRIA GENE MODULE                                                                                             | -2.9076 | 0.0000    | 0.0000    | 0.0000     |
| HOEBEKE LYMPHOID STEM CELL UP                            |      | 2.2903 | 0.0000    | 0.0007    | 0.0070              | ROSS AML OF FAB M7 TYPE                                                                                                   | -2.8934 | 0.0000    | 0.0000    | 0.0000     |
| BOYLAN MULTIPLE MYELOMA C D DN                           |      | 2.2873 | 0.0000    | 0.0006    | 0.0070              | SOTIRIOU BREAST CANCER GRADE 1 VS 3 UP                                                                                    | -2.8875 | 0.0000    | 0.0000    | 0.0000     |
| MARTENS BOUND BY PML RARA FUSION                         |      | 2.2810 | 0.0000    | 0.0006    | 0.0080              | MILI PSEUDOPODIA HAPTOTAXIS UP                                                                                            | -2.8693 | 0.0000    | 0.0000    | 0.0000     |
| OUELLET CULTURED OVARIAN CANCER INVASIVE VS LMP DN       |      | 2.2650 | 0.0000    | 0.0007    | 0.0100              | SHEN SMARCA2 TARGETS UP                                                                                                   | -2.8639 | 0.0000    | 0.0000    | 0.0000     |
| DUNNE TARGETS OF AML1 MTG8 FUSION UP                     |      | 2.2513 | 0.0000    | 0.0009    | 0.0130              | MOOTHA HUMAN MITOBD 6 2002                                                                                                | -2.8567 | 0.0000    | 0.0000    | 0.0000     |
| KEGG PHOSPHATIDYLINOSITOL SIGNALING SYSTEM               |      | 2.2498 | 0.0000    | 0.0009    | 0.0130              | WINPENNINGKX MELANOMA METASTASIS UP                                                                                       | -2.8501 | 0.0000    | 0.0000    | 0.0000     |
| SENGUPTA EBNA1 ANTICORRELATED                            |      | 2.2453 | 0.0000    | 0.0008    | 0.0130              | REACTOME TRANSLATION                                                                                                      | -2.8262 | 0.0000    | 0.0000    | 0.0000     |
| CHYLA CBF2T3 TARGETS UP                                  |      | 2.2240 | 0.0000    | 0.0015    | 0.0250              | GAZDA DIAMOND BLACKFAN ANEMIA PROGENITOR DN                                                                               | -2.8239 | 0.0000    | 0.0000    | 0.0000     |
| LEE EARLY T LYMPHOCYTE DN                                |      | 2.2235 | 0.0000    | 0.0014    | 0.0250              | STARK PREFRONTAL CORTEX 22Q11 DELETION DN                                                                                 | -2.8136 | 0.0000    | 0.0000    | 0.0000     |
| KEGG LEUKOCYTE TRANSCYTOSELIAL MIGRATION                 |      | 2.2126 | 0.0000    | 0.0016    | 0.0300              | KEGG SPLICEOSOME                                                                                                          | -2.7932 | 0.0000    | 0.0000    | 0.0000     |
| GRAHAM CML DIVIDING VS NORMAL QUIESCENT DN               |      | 2.2093 | 0.0000    | 0.0016    | 0.0310              | REACTOME INFLUENZA LIFE CYCLE                                                                                             | -2.7800 | 0.0000    | 0.0000    | 0.0000     |
| TONKS TARGETS OF RUNX1 RUNX1T1 FUSION ERYTHROCYTE UP     |      | 2.1715 | 0.0000    | 0.0032    | 0.0620              | GRAHAM NORMAL QUIESCENT VS NORMAL DIVIDING DN                                                                             | -2.7786 | 0.0000    | 0.0000    | 0.0000     |
| REACTOME SIGNALING BY RHO GTPASES                        |      | 2.1692 | 0.0000    | 0.0031    | 0.0630              | SCHLOSSER MYC TARGETS REPPRESSED BY SERUM                                                                                 | -2.7778 | 0.0000    | 0.0000    | 0.0000     |
| KEGG NATURAL KILLER CELL MEDIATED CYTOTOXICITY           |      | 2.1558 | 0.0000    | 0.0034    | 0.0710              | REACTOME 3 UTR MEDIATED TRANSLATIONAL REGULATION                                                                          | -2.7727 | 0.0000    | 0.0000    | 0.0000     |
| ZHENG FOXP3 TARGETS IN T LYMPHOCYTE DN                   |      | 2.1501 | 0.0000    | 0.0036    | 0.0770              | REACTOME INFLUENZA VIRAL RNA TRANSCRIPTION AND REPLICATION                                                                | -2.7726 | 0.0000    | 0.0000    | 0.0000     |
| SMID BREAST CANCER NORMAL LIKE UP                        |      | 2.1497 | 0.0000    | 0.0035    | 0.0780              | REACTOME PEPTIDE CHAIN ELONGATION                                                                                         | -2.7634 | 0.0000    | 0.0000    | 0.0000     |
| REACTOME GASTRIN CREB SIGNALING PATHWAY VIA PKC AND MAPK |      | 2.1400 | 0.0000    | 0.0038    | 0.0890              | SHEDDEN LUNG CANCER POOR SURVIVAL A6                                                                                      | -2.7585 | 0.0000    | 0.0000    | 0.0000     |
| VERNOCHET ADIPOGENESIS                                   |      | 2.1361 | 0.0000    | 0.0041    | 0.0990              | MOOTHA MITOCHONDRIA                                                                                                       | -2.7369 | 0.0000    | 0.0000    | 0.0000     |
| REACTOME G ALPHA Q SIGNALING EVENTS                      |      | 2.1358 | 0.0000    | 0.0039    | 0.0990              | KEGG RIBOSOME                                                                                                             | -2.7181 | 0.0000    | 0.0000    | 0.0000     |
| PID TCR PATHWAY                                          |      | 2.1253 | 0.0000    | 0.0041    | 0.1070              | ZHANG TLX TARGETS 60HR DN                                                                                                 | -2.7161 | 0.0000    | 0.0000    | 0.0000     |
| MIKKELSEN ES ICP WITH H3K4ME3 AND H3K27ME3               |      | 2.1157 | 0.0000    | 0.0046    | 0.1230              | ZHANG TLX TARGETS DN                                                                                                      | -2.6770 | 0.0000    | 0.0000    | 0.0000     |
| LIM MAMMARY LUMINAL PROGENITOR UP                        |      | 2.1008 | 0.0000    | 0.0051    | 0.1400              | REACTOME RESPIRATORY ELECTRON TRANSPORT ATP SYNTHESIS BY CHEMIOSMOTIC COUPLING AND HEAT PRODUCTION BY UNCOUPLING PROTEINS | -2.6661 | 0.0000    | 0.0000    | 0.0000     |
| ICHIBA GRAFT VERSUS HOST DISEASE 35D UP                  |      | 2.0995 | 0.0000    | 0.0050    | 0.1400              | REACTOME TCA CYCLE AND RESPIRATORY ELECTRON TRANSPORT                                                                     | -2.6641 | 0.0000    | 0.0000    | 0.0000     |
| WANG IMMORTALIZED BY HOXA9 AND MEIS1 UP                  |      | 2.0882 | 0.0000    | 0.0059    | 0.1680              | KIM WT1 TARGETS DN                                                                                                        | -2.6630 | 0.0000    | 0.0000    | 0.0000     |
| SMID BREAST CANCER RELAPSE IN PLEURA DN                  |      | 2.0773 | 0.0000    | 0.0067    | 0.1950              | REACTOME ACTIVATION OF THE MRNA UPON BINDING OF THE CAP BINDING COMPLEX AND EIFS AND SUBSEQUENT BINDING TO 43S            | -2.6628 | 0.0000    | 0.0000    | 0.0000     |
| PYEON CANCER HEAD AND NECK VS CERVICAL DN                |      | 2.0767 | 0.0000    | 0.0065    | 0.1950              | FARMER BREAST CANCER CLUSTER 2                                                                                            | -2.6593 | 0.0000    | 0.0000    | 0.0000     |
| MCLACHLAN DENTAL CARIES UP                               |      | 2.0737 | 0.0000    | 0.0065    | 0.2010              | REACTOME RNA POL II TRANSCRIPTION PRE INITIATION AND PROMOTER OPENING                                                     | -2.6576 | 0.0000    | 0.0000    | 0.0000     |
| REACTOME G ALPHA 1213 SIGNALING EVENTS                   |      | 2.0731 | 0.0000    | 0.0064    | 0.2010              | BERENJENO TRANSFORMED BY RHCA UP                                                                                          | -2.6518 | 0.0000    | 0.0000    | 0.0000     |
| DAVIES MULTIPLE MYELOMA VS MGUS DN                       |      | 2.0721 | 0.0000    | 0.0064    | 0.2040              | CHING MULTIPLE MYELOMA HYPERPLOID UP                                                                                      | -2.6443 | 0.0000    | 0.0000    | 0.0000     |
| KEGG CHEMOKINE SIGNALING PATHWAY                         |      | 2.0721 | 0.0000    | 0.0062    | 0.2040              | ZHANG TLX TARGETS 36HR DN                                                                                                 | -2.6411 | 0.0000    | 0.0000    | 0.0000     |
| GENTLES LEUKEMIC STEM CELL UP                            |      | 2.0633 | 0.0000    | 0.0066    | 0.2190              | REACTOME LATE PHASE OF HIV LIFE CYCLE                                                                                     | -2.6134 | 0.0000    | 0.0000    | 0.0000     |
| PID ALPHA SYNUCLEIN PATHWAY                              |      | 2.0628 | 0.0000    | 0.0065    | 0.2190              | REACTOME RESPIRATORY ELECTRON TRANSPORT                                                                                   | -2.6124 | 0.0000    | 0.0000    | 0.0000     |
| REACTOME IL 3 5 AND GM CSF SIGNALING                     |      | 2.0607 | 0.0000    | 0.0064    | 0.2220              | MALONEY RESPONSE TO 17AAG DN                                                                                              | -2.6121 | 0.0000    | 0.0000    | 0.0000     |
| VALK AML WITH FLT3 ITD                                   |      | 2.0562 | 0.0018    | 0.0066    | 0.2280              | RHEIN ALL GLUCOCORTICOID THERAPY DN                                                                                       | -2.6040 | 0.0000    | 0.0000    | 0.0000     |
| MCBRYAN PUBERTAL BREAST 6 7WK UP                         |      | 2.0536 | 0.0000    | 0.0066    | 0.2320              | REACTOME SRP DEPENDENT COTRANSLATIONAL PROTEIN TARGETING TO MEMBRANE                                                      | -2.5998 | 0.0000    | 0.0000    | 0.0000     |
| VERHAAK GLIOBLASTOMA MESENCHYMAL                         |      | 2.0506 | 0.0000    | 0.0069    | 0.2470              | KOBAYASHI EGFR SIGNALING 24HR DN                                                                                          | -2.5970 | 0.0000    | 0.0000    | 0.0000     |
| VERHAAK AML WITH NPM1 MUTATED UP                         |      | 2.0488 | 0.0000    | 0.0069    | 0.2540              | FISCHER G2 M CELL CYCLE                                                                                                   | -2.5961 | 0.0000    | 0.0000    | 0.0000     |
| THEILGAARD NEUTROPHIL AT SKIN WOUND DN                   |      | 2.0478 | 0.0000    | 0.0069    | 0.2580              | DING LUNG CANCER EXPRESSION BY COPY NUMBER                                                                                | -2.5880 | 0.0000    | 0.0000    | 0.0000     |
| TAKEDA TARGETS OF NUP98 HOXA9 FUSION 10D DN              |      | 2.0426 | 0.0000    | 0.0071    | 0.2720              | REACTOME RNA POL II PRE TRANSCRIPTION EVENTS                                                                              | -2.5792 | 0.0000    | 0.0000    | 0.0000     |
